# Supplementary material for: Quantum dots for a high-throughput Pfu polymerase based multi-round polymerase chain reaction (PCR)
Source: Royal Society of Chemistry journal article supplement (doi:10.1039/c7an01764b), 2018-01-01

**Figure S1.** The effect of QDs on the multiple rounds amplification of a 111 bp target DNA from plasmid DNA after 1h preincubation at 50 °C. Pfu DNA polymerase was used; Lane M: MW DL2000; The numbers marked above the lanes were the concentrations of QDs in nM.

**Figure S2.** The effect of AuNPs on the multiple rounds amplification of a 400 bp target DNA from the marine fouling organisms genome DNA after 1h preincubation at 50 °C. Pfu DNA polymerase was used; Lane M: MW DL2000; The numbers marked above the lanes were the concentrations of QDs in nM.

**Figure S3.** The effect of three different different surface modified QDs in multi-round PCR. The numbers marked above the lanes were representative of different concentrations of QDs, which were 0, 42, 83, 125 and 166 nM.

**Figure S4.** The effects of QDs concentration on the specificity of PCR after 1h preincubation at 50 °C. Pfu DNA polymerase was used; Lane M: MW DL2000; The numbers marked above the lanes were the concentrations of QDs in nM.

Figure S1

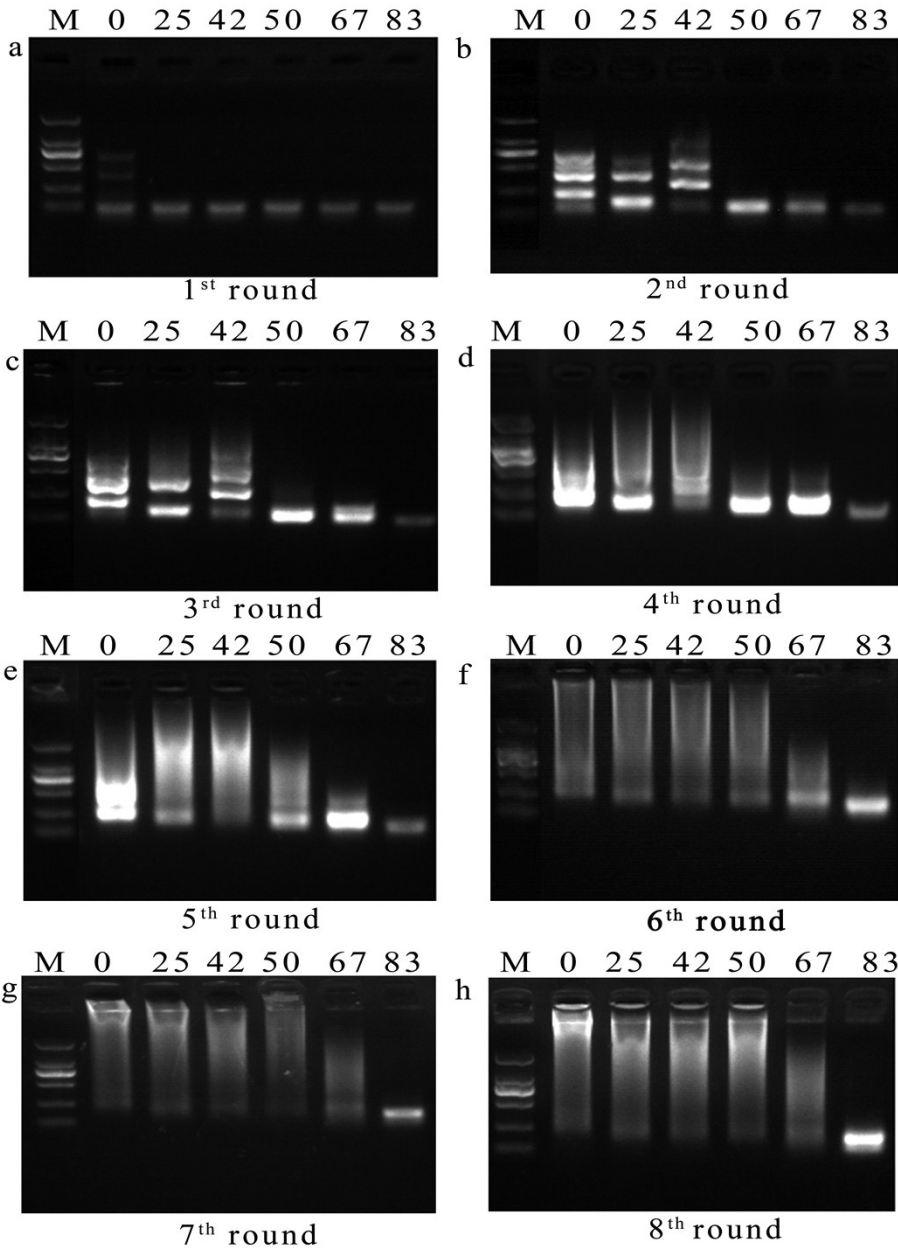

Figure S2.

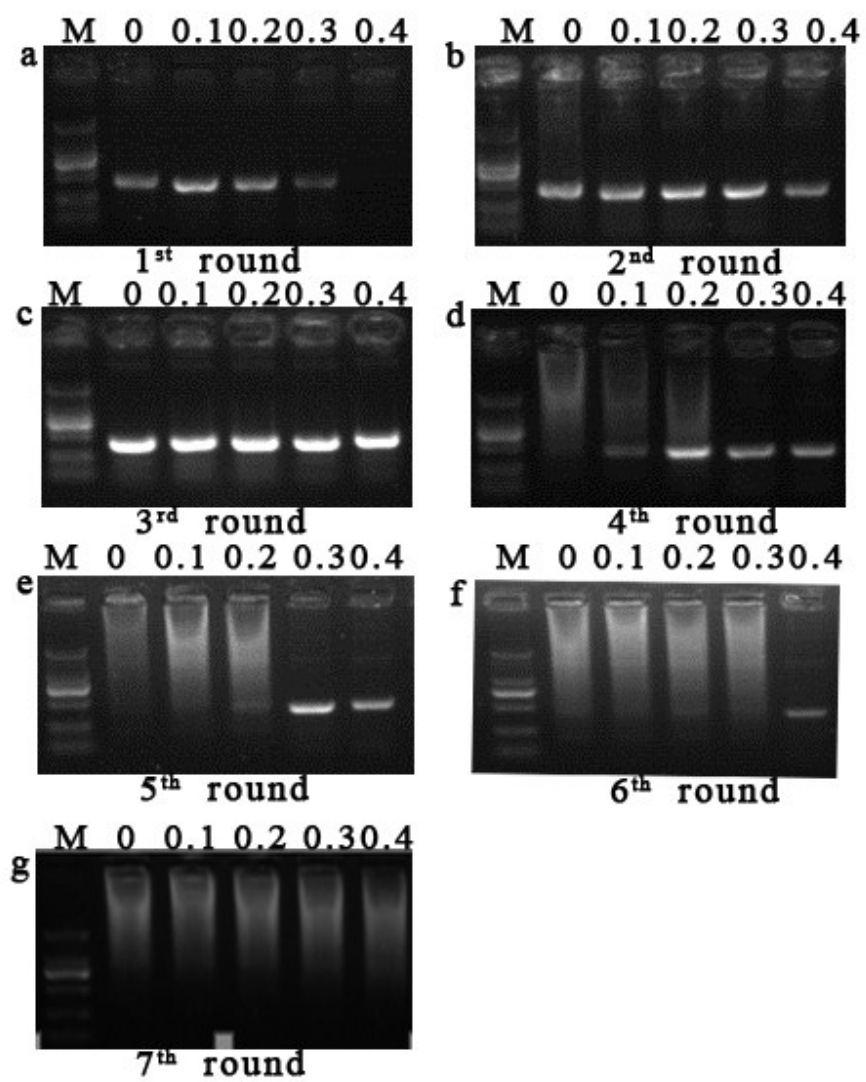

Figure S3

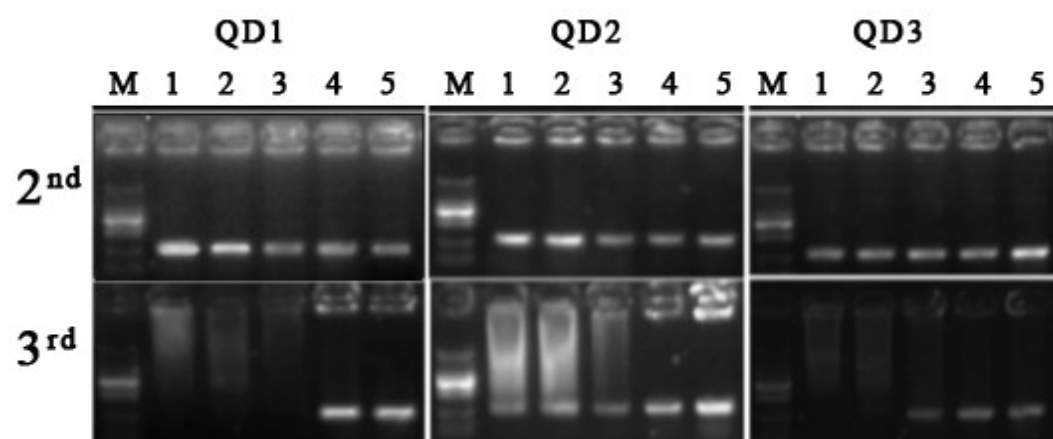

**Figure S4**

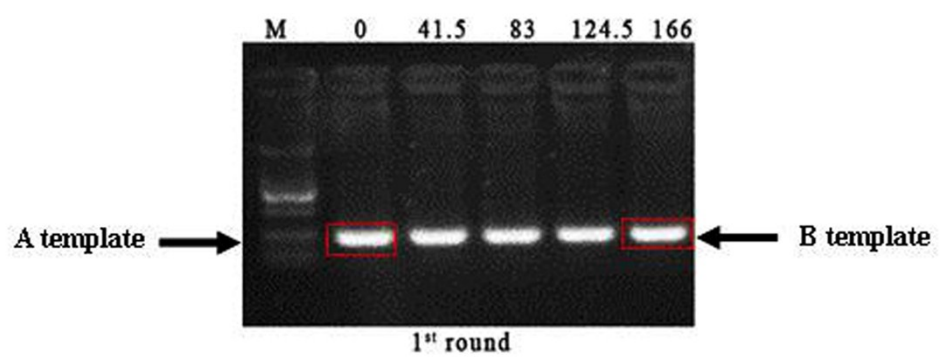

Supplement: c7an01764b1.pdf [file c7an01764b1.pdf]
