# Supplementary material for: Quantum dots for a high-throughput Pfu polymerase based multi-round polymerase chain reaction (PCR)
Source: Royal Society of Chemistry journal article supplement (doi:10.1039/c7an01764b), 2018-01-01
Supplement: c7an01764b2.pdf [file c7an01764b2.pdf]

Table S1. Three different surface modified QDs

| No  | Cd/Te/NAC | C <sub>CD</sub> (mM) | pH   |
|-----|-----------|----------------------|------|
| QD1 | 1/0.2/2.5 | 2.5                  | 9.5  |
| QD2 | 1/0.2/2.5 | 3.0                  | 11.0 |
| QD3 | 1/0.2/2.5 | 3.0                  | 9.5  |
